# Supplementary material
Source: publisher figshare collection journal article supplement (https://tandf.figshare.com/articles/dataset/_/2117041)
Supplement: Supplementary file 1 [file 2]

## SUPPLEMENTARY MATERIAL

The R code for the simulation described in the paper: How Robust Are Multi-Rater Inter-Rater Reliability Indices to Changes in Frequency Distribution?

```
#####  
# How Robust Are Multi-Rater Inter-Rater Reliability Indices #  
# to Changes in Frequency Distribution? #  
#####  
#  
# A Monte Carlo simulation exploring the effects of level changes  
# and frequency distribution changes on 5 IR indices.  
  
##### GLOBAL VARIABLES #####  
numFDs = 6  
numADs = 6  
allIRs = array(0,c(5,11,numFDs,numADs))  
#####  
  
# Returns a 6 x L matrix where (a,b) is probability of a scorer 1 giving rating b  
# assuming frequency distribution a. L is the number of levels in the scale.  
# All 6 FDs are special cases of the beta-binomial distribution.  
buildFDMatrix = function(L = 9)  
{  
  # need dbetabinom.ab function  
  library(VGAM)  
  
  shapes = list(c(0.25,0.25), c(1,1), c(2,2), c(50,50), c(25,50), c(5,50))  
  
  probs = array(0,c(numFDs,L))  
  for (i in 1:numFDs) probs[i,] = dbetabinom.ab(x=0:(L-1),size=L-1,shape1=shapes[[i]][1],  
                                                  shape2=shapes[[i]][2])  
  
  return(probs)  
}  
  
# Create a discrete uniform distribution with finite support on {a,a+1,...,b}  
# x is a vector of indices containing the range a:b, 0s are placed outside a:b  
discUnif = function(x,a,b)  
{  
  prob = 1/(b-a+1)  
  probs = rep(0,length(x))  
  probs[a:b-x[1]+1] = prob  
  return(probs)  
}  
  
# Create a discrete triangular distribution with support on {a,a+1,...,b}; size of support  
# should be odd. If so, the high point will be at (b-a)/2; values at a and b are 0  
discTriang = function(x,a,b)  
{  
  if ((b-a) %% 2 != 0) stop("Size_of_finite_support_must_be_odd")  
  c = (b+a)/2  
  h = 2/(b-a)  
  slope = h/(c-a)  
  ups = slope * (a:c - a)  
  downs = -slope * ((c+1):b - b)  
  triang = c(ups,downs)  
  triang = triang/sum(triang)  
  probs = rep(0,length(x))  
  probs[a:b-x[1]+1] = triang  
  return(probs)  
}  
  
# Returns a 6 x L x L matrix where (a,b,c) is probability of a scorer giving rating c  
# when rater 1 gives rating b assuming an agreement distribution a. L is the number of  
# levels in the scale.  
buildADMMatrix = function(L = 9)  
{  
  # even L values are a problem for binom distributions since we want a mode  
  # in our ADs; add 2 to move 0 endpoints of triangular distribution outside support  
  B = ifelse(L %% 2 == 0, L,L-1)+2
```

```

ADs = list(function(B) dbinom(x=(2-B):(2+B), prob=1/2, size=4),
            function(B) dbinom(x=(-B/2):(3*B/2), prob=1/2, size=B),
            function(B) discTriang(x=-B:B, -2, 2),
            function(B) discTriang(x=-B:B, -floor(B/2), floor(B/2)),
            function(B) discUnif(x=-B:B, -floor(B/4), floor(B/4)),
            function(B) discUnif(x=-B:B, -B, B))

# now move the support window around all possible R1 values
probs = array(0, c(numADs, L, L))
for (a in 1:numADs) {
  for (r1 in 1:L) {
    lb = (B+2-r1)
    ub = lb + L - 1
    # shift!
    unscaled = ADs[[a]](B)[lb:ub]
    # rescale probabilities when things fall outside 1:L
    unscaled[is.na(unscaled)] = 0
    probs[a, r1, ] = unscaled/sum(unscaled)
  }
}

return(probs)
}

# This function returns an array where the rows represent different frequency distributions
# and the columns are different agreement distributions. The entries are the IRs unders
# those conditions, averaged across numSims simulations. By repeatedly calling this
# method with various inputs, we can explore how all the parameters interrate, and hence,
# what factors most powerfully influence IR.
buildIRs = function(numLevels = 9, numUnits = 20, numRaters = 8, numSims = 5,
                    IRfunc = krippen.alpha.raw)
{
  fdmat = buildFDMatrix(numLevels)
  admat = buildADMMatrix(numLevels)

  ratings = array(0, c(numFDs, numADs, numRaters, numUnits, numSims))

  # build rater 1's scores using fdmat
  for (fd in 1:numFDs)
    ratings[fd, , 1, , ] = sample(x=c(1:numLevels),
                                   size=numADs*numUnits*numSims,
                                   prob=fdmat[fd, ],
                                   replace=TRUE)

  # build scores for raters 2 through numRaters using admat
  for (fd in 1:numFDs)
    for (ad in 1:numADs)
      for (u in 1:numUnits)
        for (s in 1:numSims) {
          r1 = ratings[fd, ad, 1, u, s]
          ratings[fd, ad, 2:numRaters, u, s] = sample(x=c(1:numLevels),
                                                         size=numRaters-1,
                                                         prob=admat[ad, r1, ],
                                                         replace=TRUE)
        }

  # build IRs for each sim
  IRVals = array(0, c(numFDs, numADs, numSims))
  for (fd in 1:numFDs)
    for (ad in 1:numADs)
      for (s in 1:numSims)
        IRVals[fd, ad, s] = IRfunc(t(ratings[fd, ad, , , s]), weights="quadratic", print=FALSE)[3]

  return(apply(IRVals, c(1, 2), mean))
}

# Builds all the IRs used in the paper. Approx run time: 1 hour, 40 minutes
# Alters the global allIRs matrix where (ir, L, fd, ad) is found by:
# 1) Take a fixed fd and ad. Build a ratings table with 8 raters and 100 units
#    assuming a scale with L levels.
# 2) Calculate the IR using IR function ir.
# 3) Repeat the process for 500 iterations and average the 500 IR results.
# This value goes in spot (ir, L, fd, ad).
# Possible levels (values for L): 4 to 11
# Possible IR indices (values for ir): fleiss, conger, krippendorff,
#                                     brennan-prediger, gwet AC2 (called ac1 below)
buildAllIRs = function()
{
  irfuncs = list(fleiss.kappa.raw, conger.kappa.raw, krippen.alpha.raw,
                 bp.coeff.raw, gwet.ac1.raw)
  for (ir in 1:5)
    for (L in 4:11) {
      allIRs[ir, L, , ] <- buildIRs(numLevels=L, numUnits=100, numRaters = 8,
                                     numSims = 500, IRfunc = irfuncs[[ir]])
    }
}

```

```

    #code to watch progress
    print(paste("done_with", ir, "_", L))
  }
}

# Creates visualizations for the allIRs global variable which is passed as the
# parameter data; prints a black and white figure if color is false
# generates 5 total plots; these are sent to PDFs if printToFile is true
createLevelPlots = function(data, color = TRUE, printToFile = F)
{
  library(lattice)

  IRNames = c("Fleiss's_kappa", "Conger's_kappa", "Krippendorff's_alpha",
    "Brennan-Prediger_coefficient", "Gwet's_AC2")

  path = "C://Users//dquarfoot//Desktop//GradSchool//Dissertation//AmerStat_Paper//FinalVersion"
  fileNames = c("fleissplot.pdf", "congerplot.pdf", "krippplot.pdf",
    "bpplot.pdf", "gwetplot.pdf")
  version = ifelse(color, "col", "bw")
  fileNames = paste(version, fileNames, sep="")
  fileNames = paste(path, fileNames, sep="//")

  myPanel = function(x, y, z, ...)
  {
    panel.levelplot(x,y,z,...)
    panel.text(x, y, round(z,2))
  }

  if (color) { # use color for online printing
    pal = cm.colors(40)
  } else # use white to gray for journal printing
    pal = gray(100:61/100)

  for (ir in 1:5) {
    X = c(numADs:1)
    Y = c(1:numFDs)
    grid = expand.grid(X=X,Y=Y)
    grid$Z = as.vector(data[ir, ,]) # use 9-level Likert scale
    if (printToFile) pdf(file=fileNames[ir], width = 6, height = 4)

    plot(levelplot(Z ~ Y*X, grid, panel = myPanel,
      col.regions = pal,
      scales=list(x=list(at=c(1:numADs), labels=paste("AD", c(1:numADs))),
        y=list(at=c(numFDs:1), labels=paste("FD", c(1:numFDs)))),
      xlab="", ylab="", main=paste("Average_IRs_using", IRNames[ir])))

    if (printToFile) dev.off()
  }
}

# Makes the plots studying the effect of the number of levels, L
# generates 2 total plots; again, these are sent to a PDF if printToFile is true
createViz2 = function(data, color=TRUE, printToFile=F)
{
  library(latticeExtra)

  path = "C://Users//dquarfoot//Desktop//GradSchool//Dissertation//AmerStat_Paper//FinalVersion"
  fileNames = c("levels13.pdf", "levels46.pdf")
  version = ifelse(color, "col", "bw")
  fileNames = paste(version, fileNames, sep="")
  fileNames = paste(path, fileNames, sep="//")

  colorModel = ifelse(color, "srgb", "gray")

  ind = which(!is.na(data), arr.ind=TRUE)
  df = as.data.frame(cbind(data, ind))
  names(df) = c("val", "IR", "levels", "FD", "AD")

  # not enough space for 6x6 plot, so we break it into 2 3x6 plots
  plotgroup = list(c(1:3), c(4:6))

  for (i in 1:2) {
    ddf = subset(df, (FD %in% plotgroup[[i]]))

    # append FD or AD to number to make clearer in plot
    ddf$FD = factor(paste("FD", ddf$FD))
    ddf$AD = factor(paste("AD", ddf$AD))
    ddf$FD = factor(ddf$FD, levels = rev(paste("FD", plotgroup[[i]]))) # fix plot order

    if (printToFile) pdf(file=fileNames[i], paper='a4r', width=11,
      height = 8, colorModel=colorModel)

    # now plot
    plot(useOuterStrips(
      xyplot(val ~ levels | factor(AD) + factor(FD), group = factor(IR),
        data=ddf, main="Influence_of_Levels_on_IR",
        xlab = "Number_of_Levels", ylab = "IR_Value", type=c("l", "p"),

```

```

        scales=list(x= list(at=1:8,labels = 4:11, cex = 0.7)),
        par.settings = list(superpose.symbol = list(pch = 1:5),
                             superpose.line=list(lty=1:5)),
        auto.key=list(text = c("Fleiss","Conger","Krippendorff",
                                "Brennan-Prediger","Gwet-AC1/2"),
                       space="top", columns=5, points=T, lines=T, cex.title=1),
        strip = strip.custom(factor.levels = factor(ddf$AD)),
        strip.left=strip.custom(factor.levels = factor(ddf$FD)))) + theme_bw()

    if (printToFile) dev.off()
}
}

# Draws the 6 FDs in a grid layout of row rows and col columns
drawFDs = function(row=3,col=2,L = 9)
{
    names = c("FD_1:_Extremes","FD_2:_Uniform","FD_3:_Central","FD_4:_Binomial",
              "FD_5:_Skewed","FD_6:_Very_Skewed")
    par(mar=c(4.5,2,1,1))
    par(mfrow=c(row,col))
    fdmat = buildFDMatrix(L)
    for (i in 1:numFDs)
        barplot(fdmat[i,], #ylim=c(0,max(fdmat)+0.05),
                xlab=names[i])
}

# Draws the 6 ADs in a grid layout of row rows and col columns
drawADs = function(row=3,col=2,L = 9,r1 = floor((L+1)/2))
{
    names = c("AD_1:_Fixed-Width-Binomial","AD_2:_Fully-Scaling-Binomial",
              "AD_3:_Fixed-Width-Triangular","AD_4:_Fully-Scaling-Triangular",
              "AD_5:_Partially-Scaling-Uniform","AD_6:_Fully-Scaling-Uniform(Random)")
    par(mar=c(4.5,2,1,1))
    par(mfrow=c(row,col))
    admat = buildADMatrix(L)
    for (i in 1:numFDs) {
        barplot(admat[i,r1,],xlab=names[i])
        axis(1,at=c(r1+0.5),labels=c("*"))
    }
}

# Shows a faceted bar chart for AD2 assuming L = 9 to give a feel for how
# the AD depends on R1's score
drawViz = function(L = 9, ADNum = 2)
{
    library(ggplot2)

    data =buildADMatrix(L)[ADNum,]
    dataf = as.data.frame(which(array(T,c(L,L)),arr.ind = T))
    dataf$val = as.vector(data)
    names(dataf) = c("R1","OtherRater","prob")
    dataf$R1 = as.factor(dataf$R1)
    dataf$OtherRater = as.factor(dataf$OtherRater)

    temp = ggplot(dataf, aes(x=OtherRater,y=prob)) +
        geom_bar(stat="identity") +
        facet_wrap(~ R1, ncol = 3) +
        xlab("Other_Rater's_Score")
    plot(temp)
}

# Creates the histograms for the Geometry problems study
# Uses data from the variable raters (from elsewhere)
geomHistograms = function(printToFile=F)
{
    path = "C://Users//dquarfoot//Desktop//GradSchool//Dissertation//AmerStat_Paper//FinalVersion"
    fileNames = c("diff.pdf","nov.pdf","pd.pdf","auth.pdf")
    fileNames = paste(path,fileNames,sep="//")

    whichOnes = c(1,3,12,14)
    names = c("Difficulty","Novelty","Productive_Dispositions","Authenticity")

    for (i in 1:4) {
        scores = NULL
        for (j in 1:8) { # the expert panel
            scores = c(scores,raters[[j]]$pscores[,whichOnes[i]])
        }
        if (printToFile) pdf(file=fileNames[i],width = 6, height = 4)

        barplot(table(factor(scores,levels=1:9)),
                main = paste("Histogram_of",names[i]),
                xlab = "Rating", ylab = "Count", space = 0)

        if (printToFile) dev.off()
    }
}
}

```
